# Supplementary material for: Phytochemical Profiling, Antioxidant and Tyrosinase Regulatory Activities of Extracts from Herb, Leaf and In Vitro Culture of Achillea millefolium (Yarrow)
Source: MDPI journal article supplement (doi:10.3390/molecules28124791), 2023-06-15

Phytochemical profiling, antioxidant and tyrosinase regulatory activities of extracts from herb, leaf and in vitro culture of *Achillea millefolium* (yarrow)

Karolina Czech, Katarzyna Gawel-Beben, Agnieszka Szopa, Wirginia Kukuła-Koch, Thomas Jakschitz, Günther Bonn, Faryal Rubaba, Hira Ijaz, Shah Hussain, Paweł Kubica, Halina Ekiert and Kazimierz Głowniak

Supplementary materials

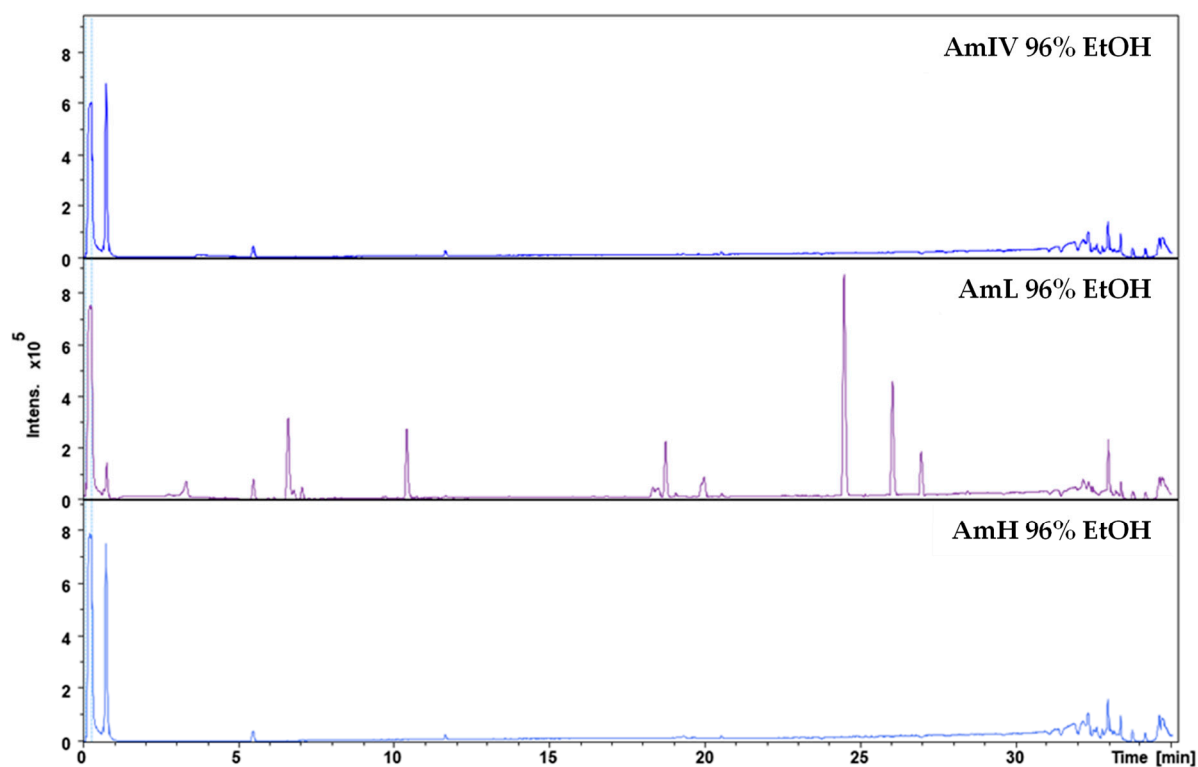

**Figure S1.** Listed base peak chromatograms for ethanol extracts from AmIV, AmL and AmZ. Chromatograms highlight the unique features in AmL extracts.

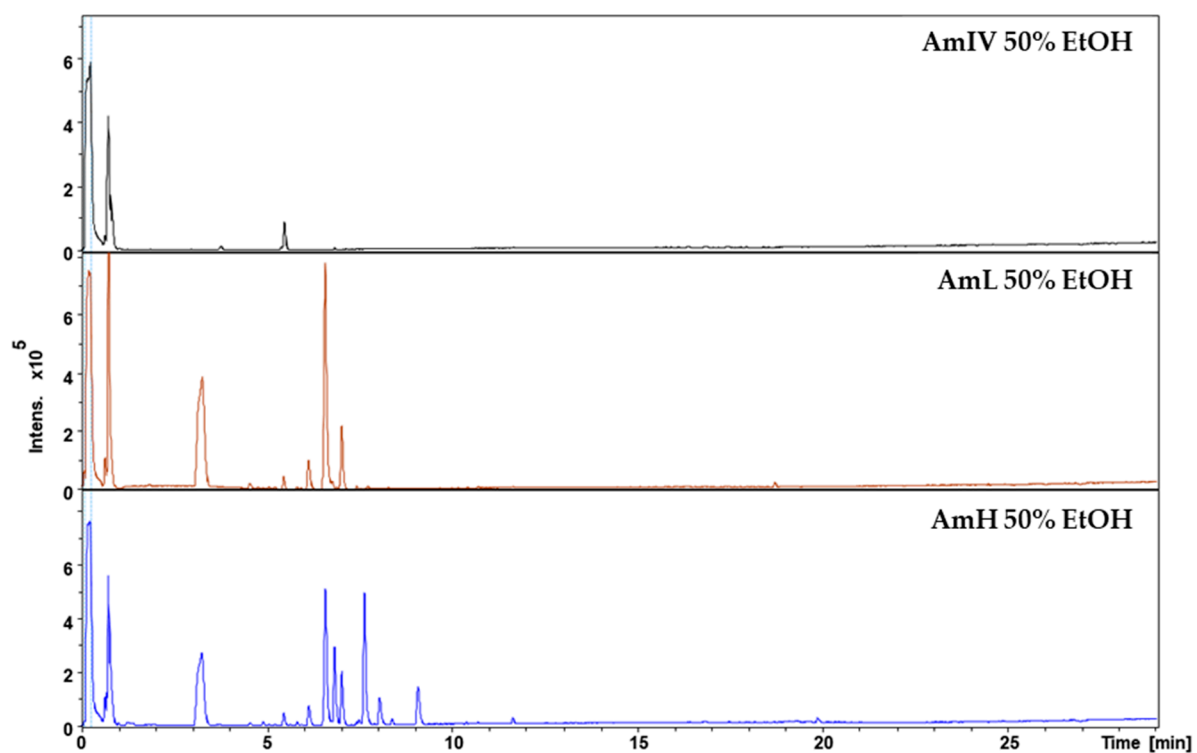

**Figure S2.** Listed base peak chromatograms for 50% ethanol extracts from AmIV, AmL and AmZ in the negative ionization mode. Chromatograms highlight the high abundance of caffeoyl-quinic acids in AmL extracts, while AmZ extracts were found rich in flavonoids and their glucosides.

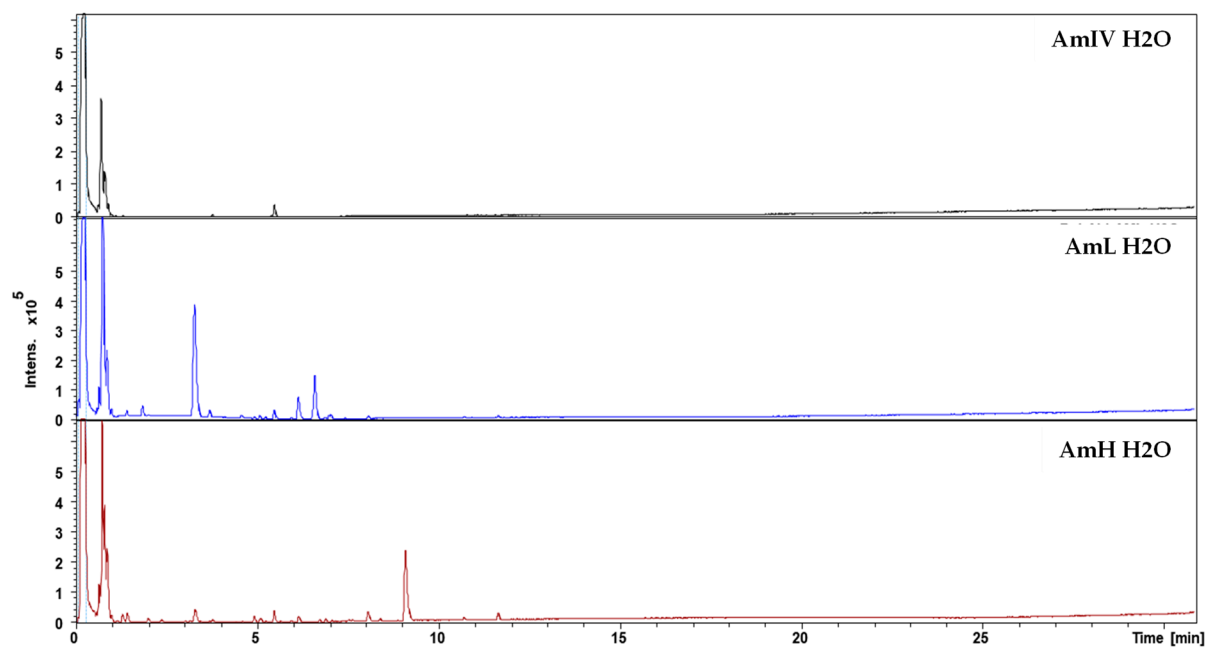

**Figure S3.** Listed base peak chromatograms for water extracts from AmIV, AmL and AmZ (AmL unveils high amount of caffeoyl-quinic acids) recorded I the negative ionization mode.

**Figure S4.** (a) Scores plot of principal component analysis covering all the water extracts from AmIV, AmL and AmZ (b) Scores plot of principal component analysis encompassing all the ethanol extracts from AmIV, AmL and AmZ (c) Scores plot of principal component analysis covering all the 50% ethanol extracts from AmIV, AmL and AmZ

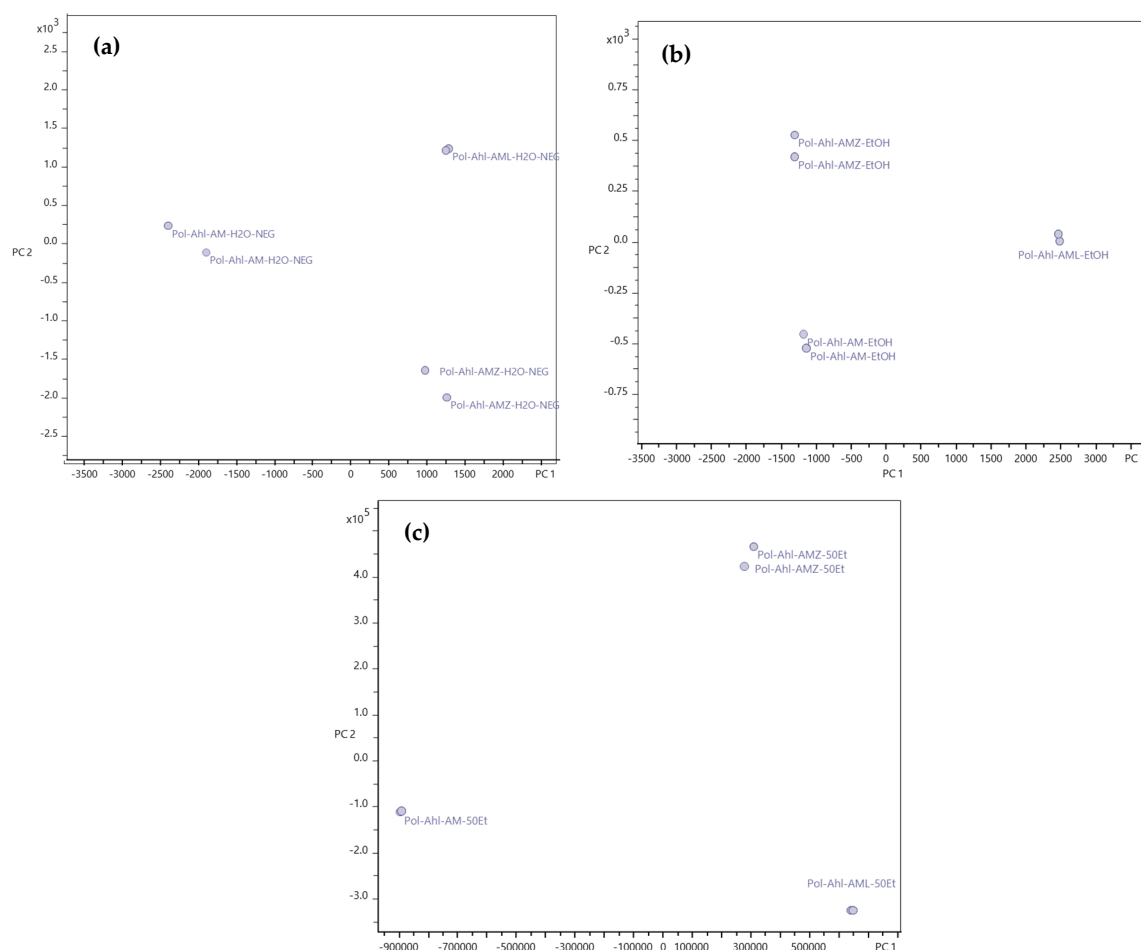

Supplement: s1 [file s1]
